# Supplementary material for: SomInaClust: detection of cancer genes based on somatic mutation patterns of inactivation and clustering
Source: PubMed Central journal article supplement (PMC4410004; doi:10.1186/s12859-015-0555-7), 2015-04-23

# COAD

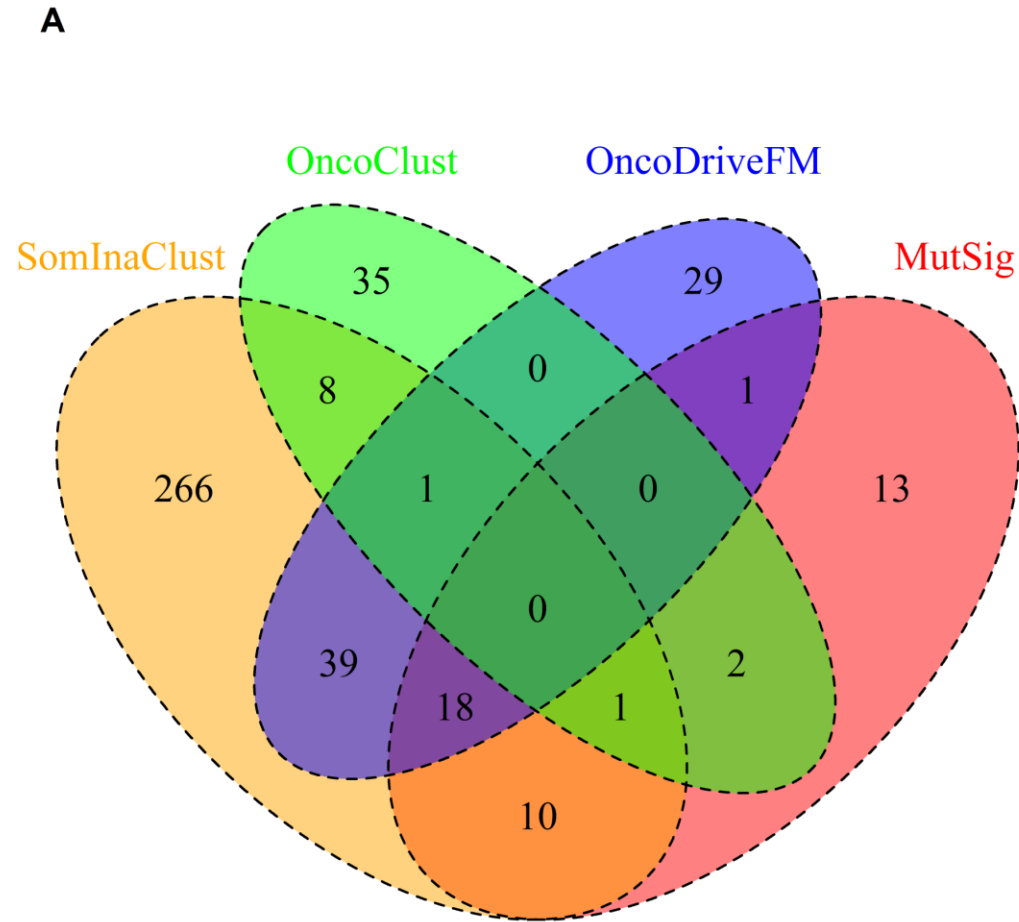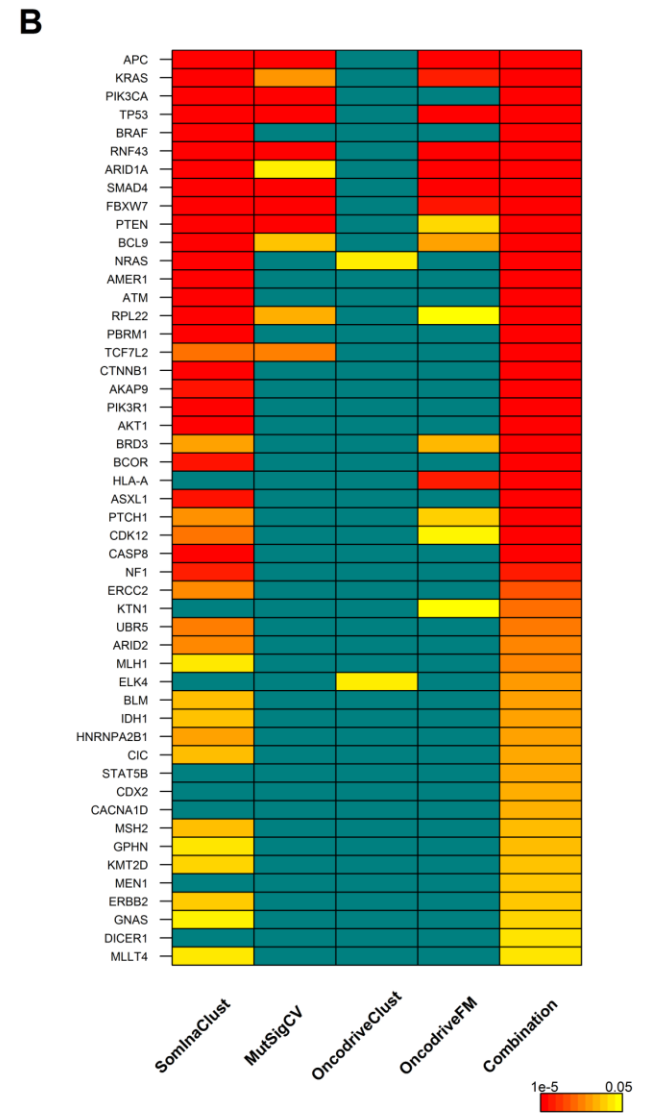

# GBM

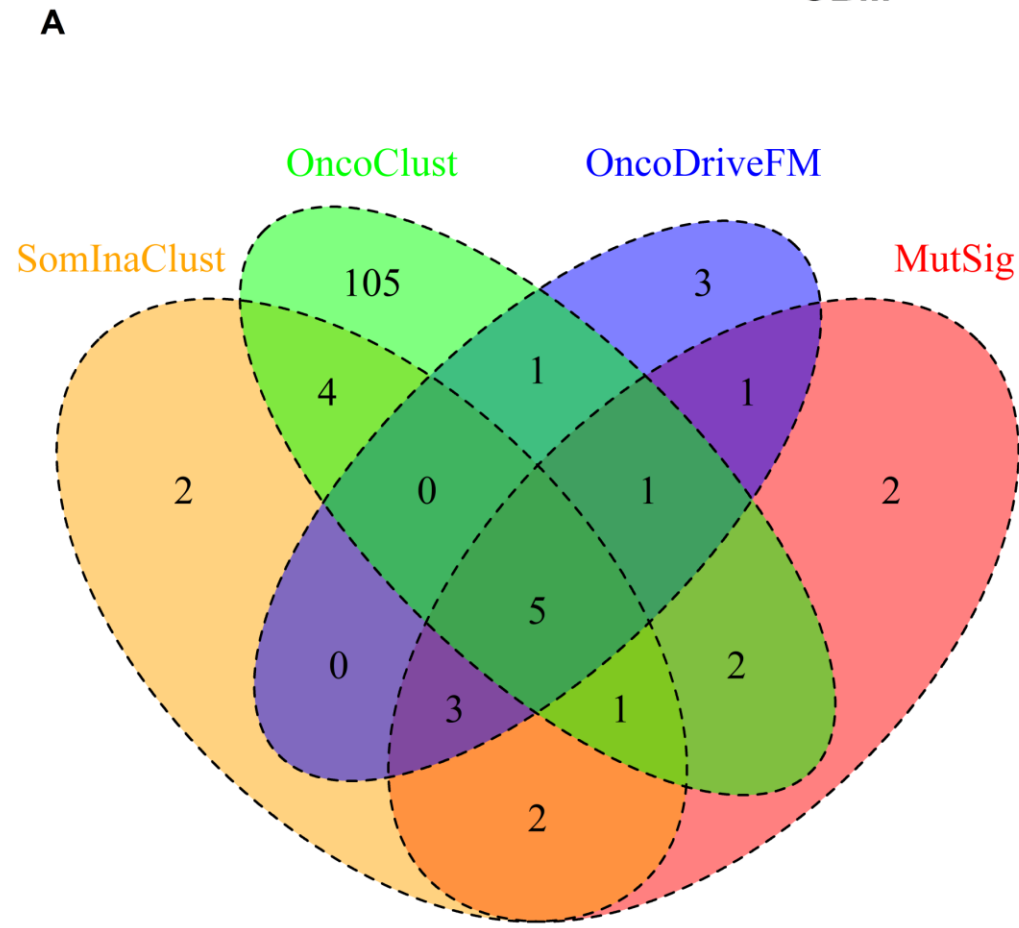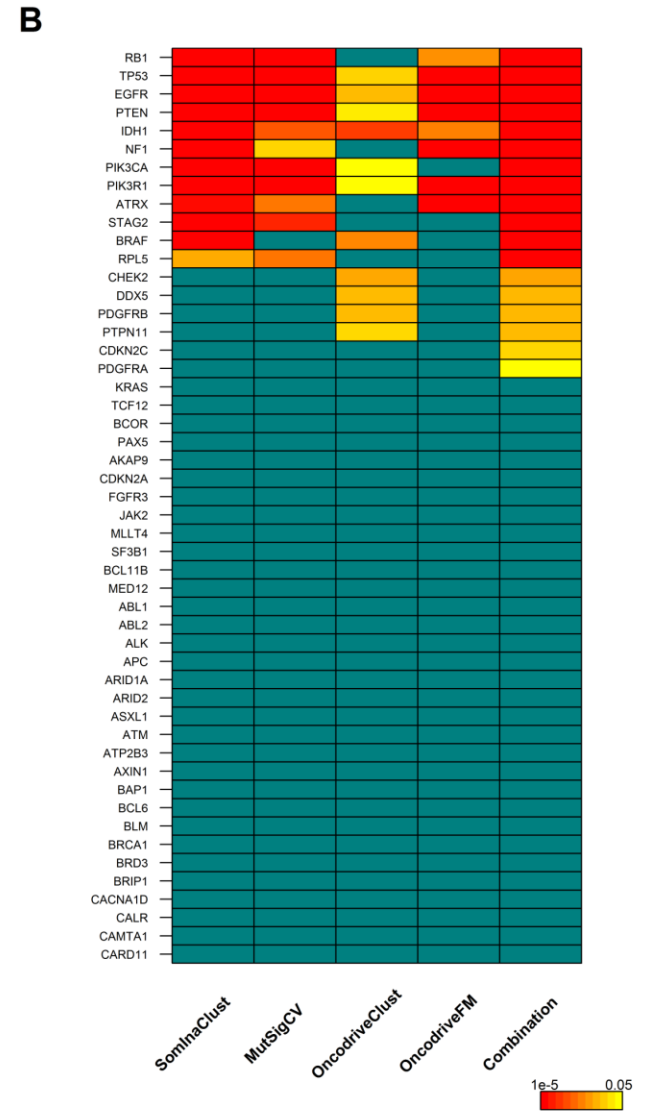

# HNSC

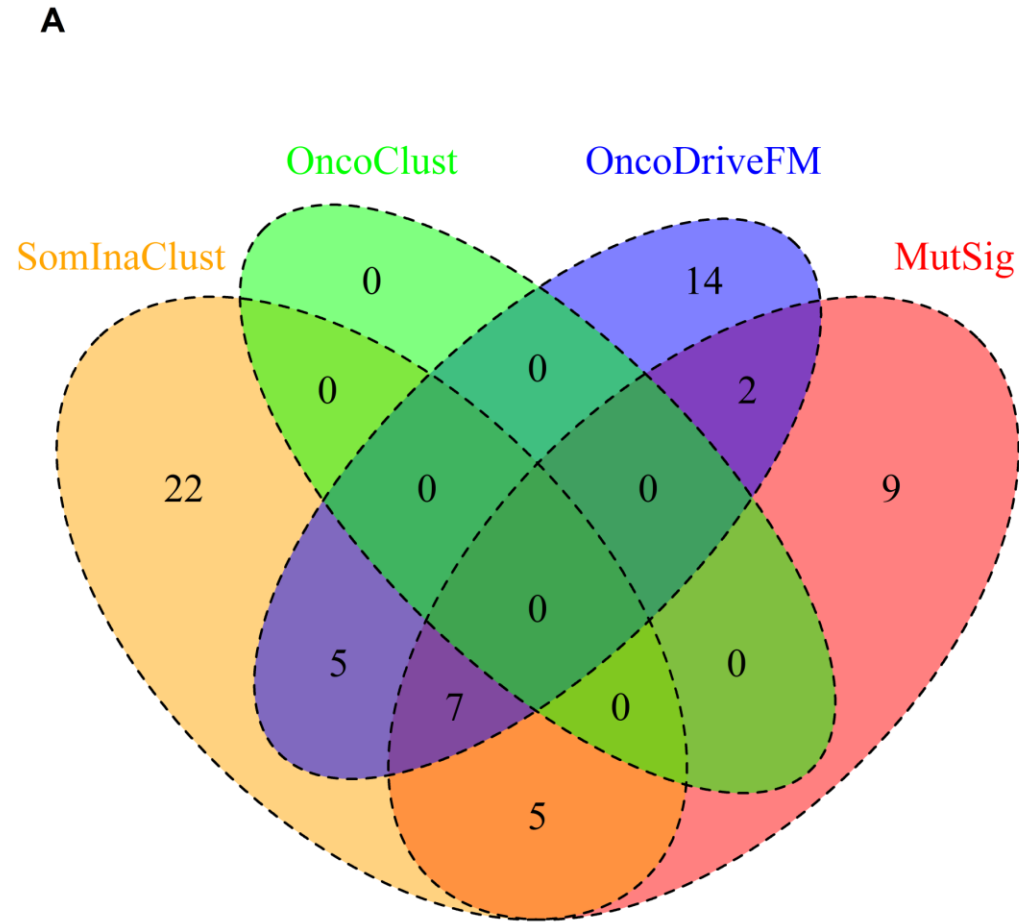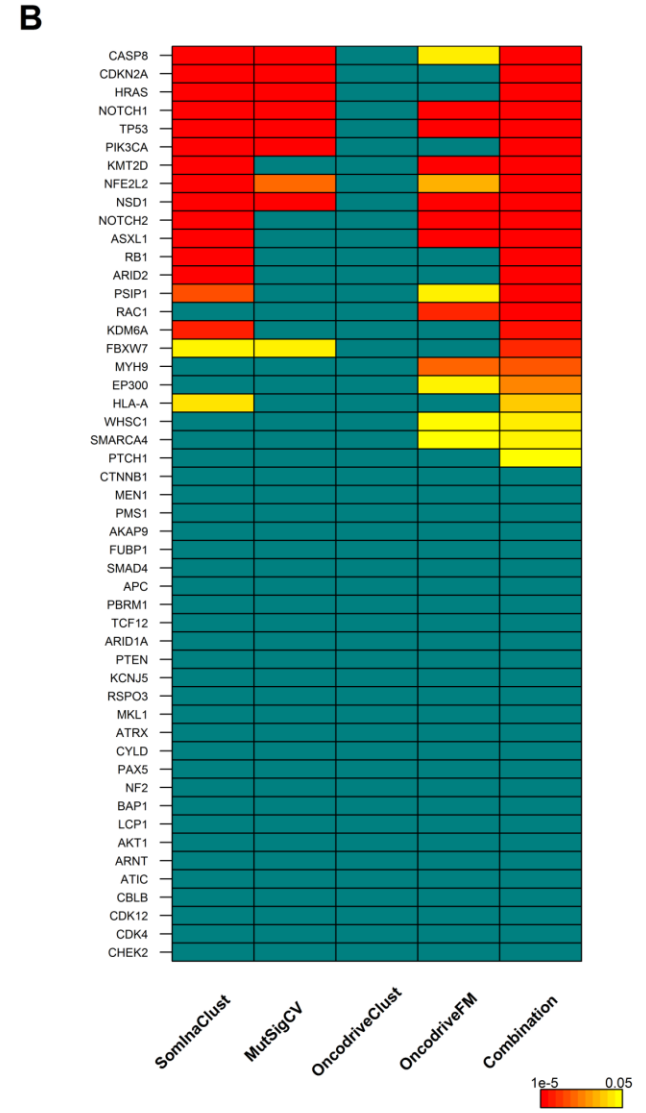

# LUSC

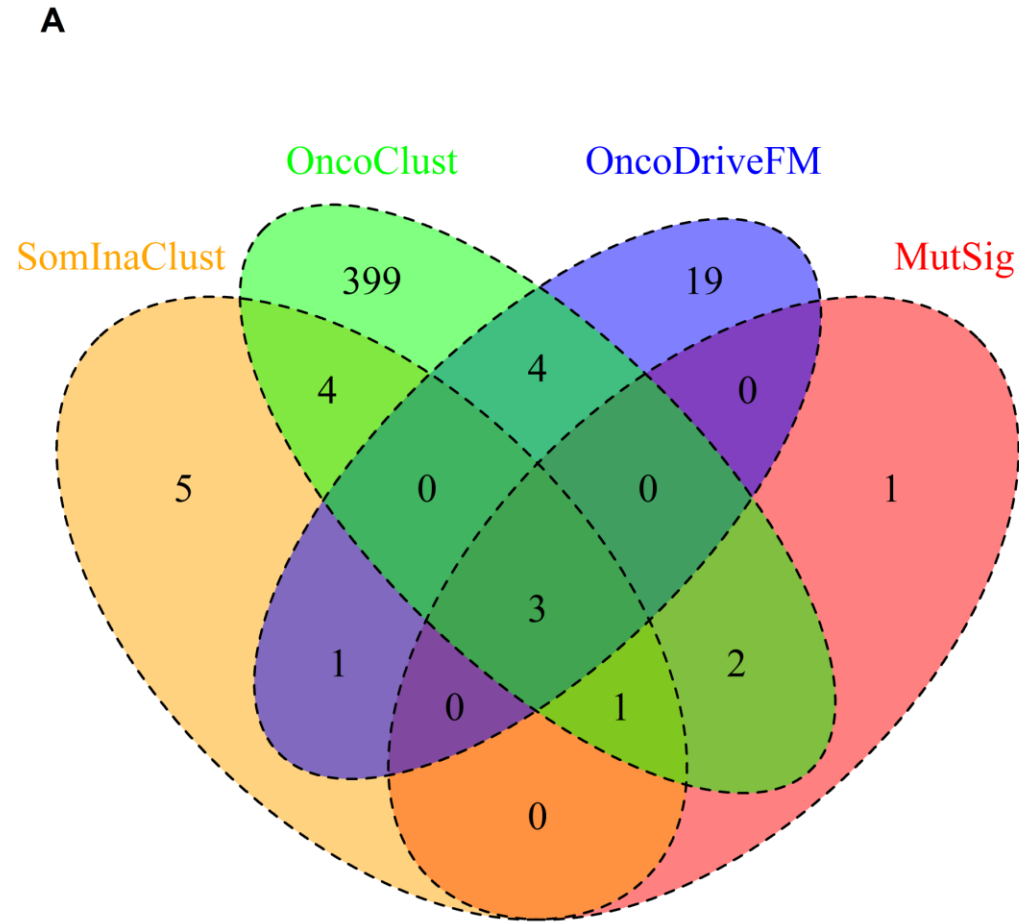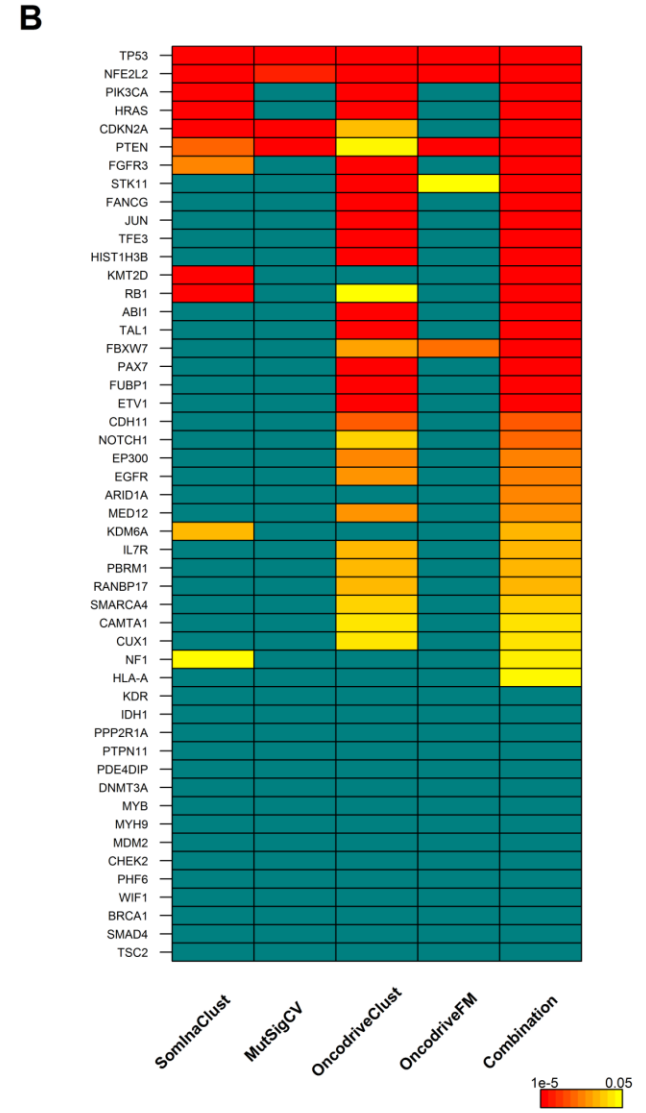

OV

A

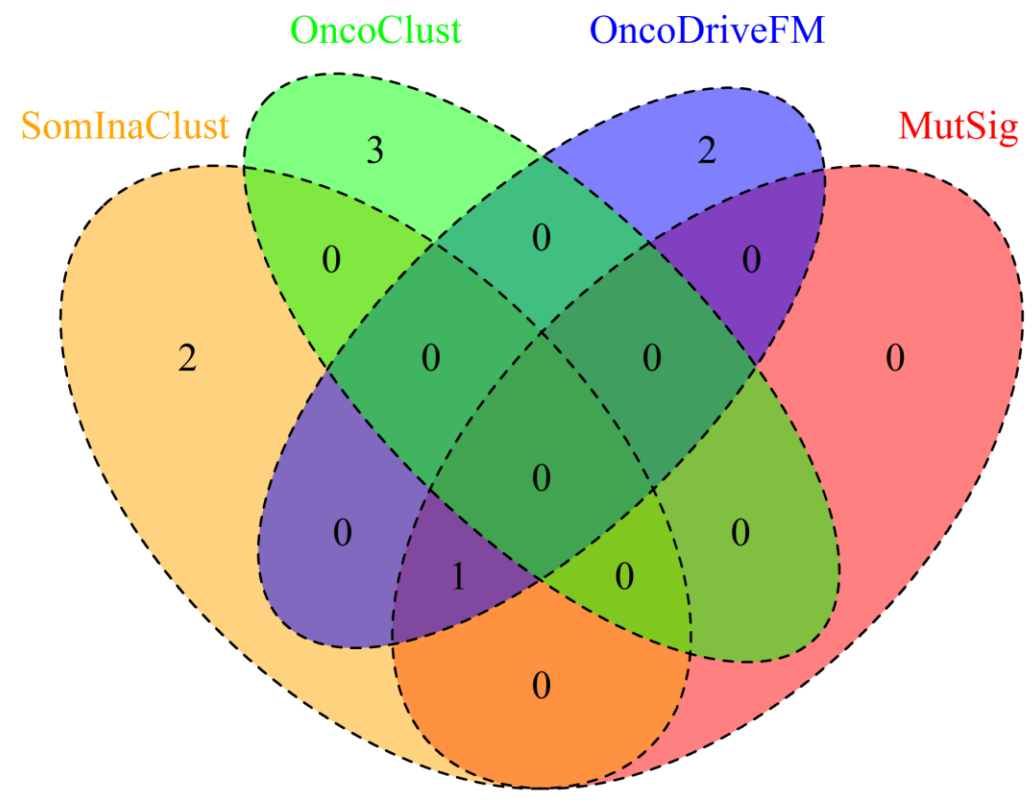

B

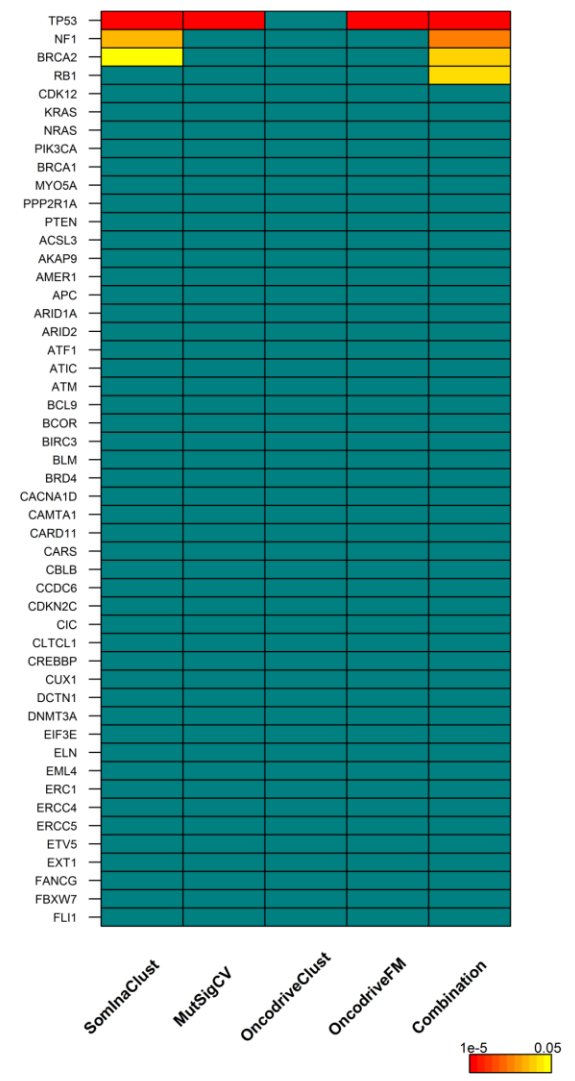

# READ

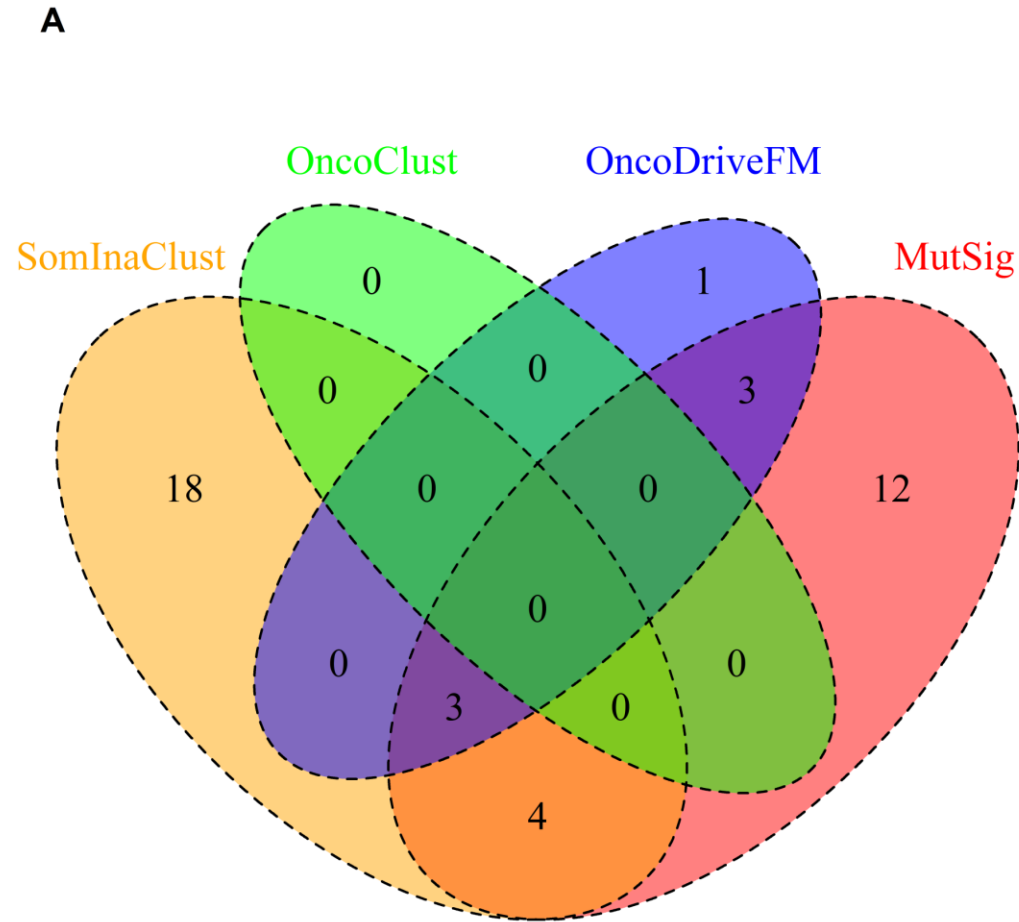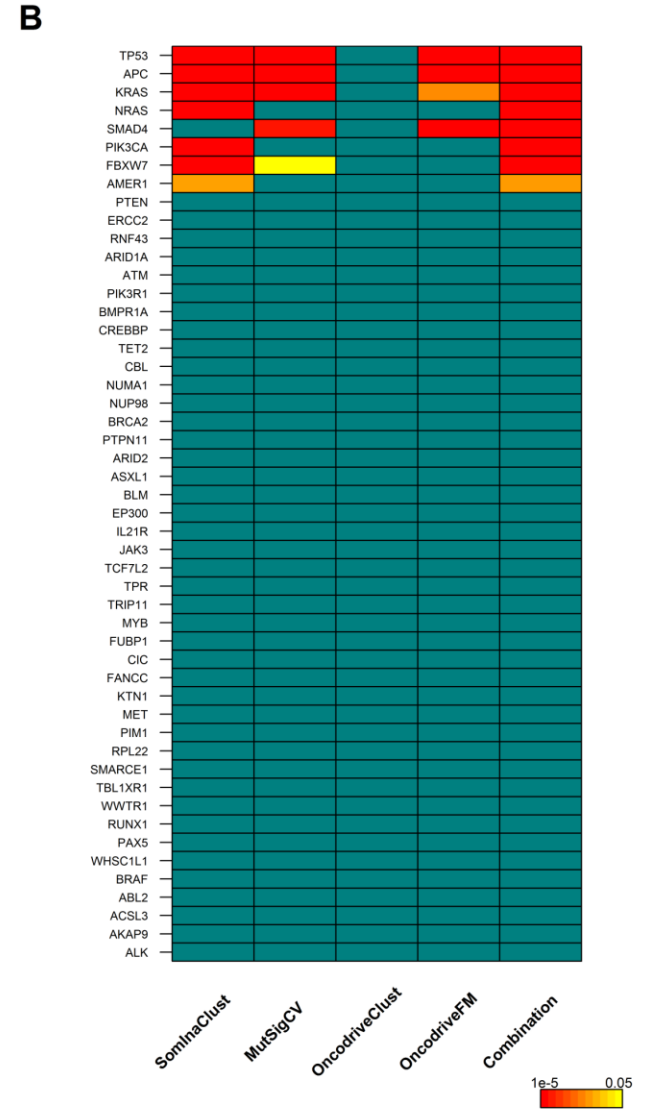

# UCEC

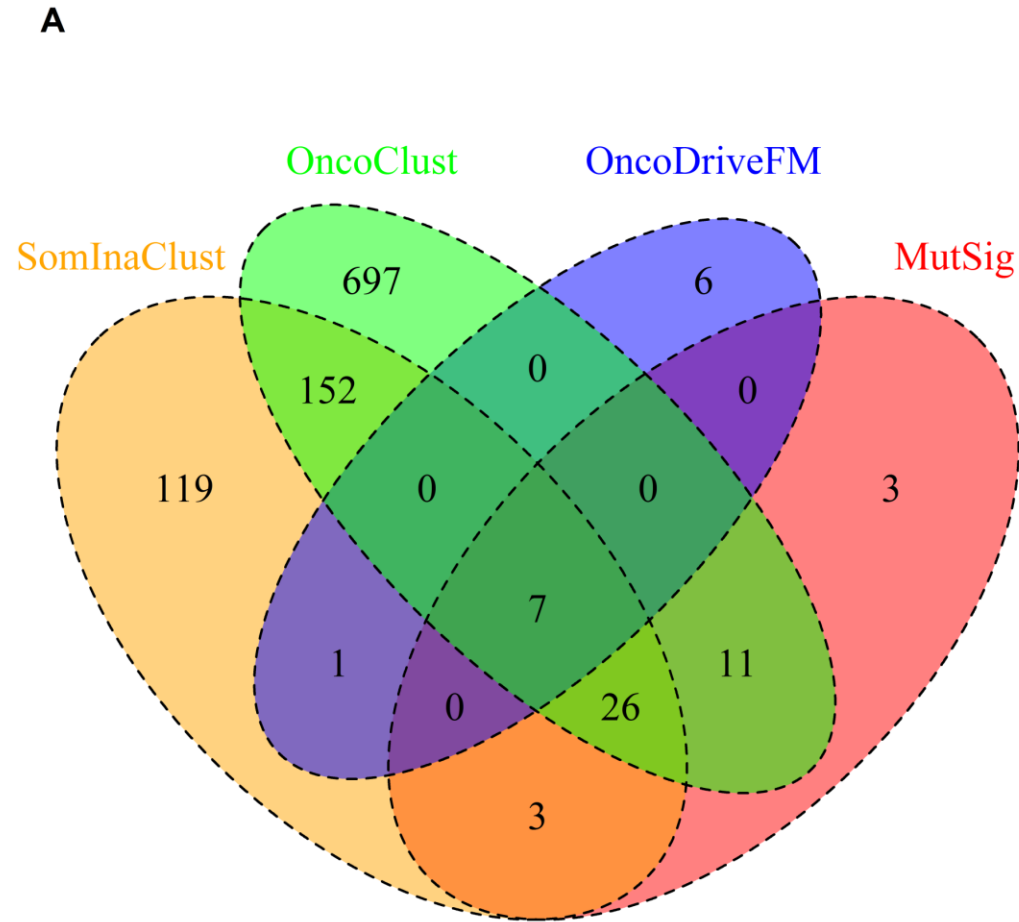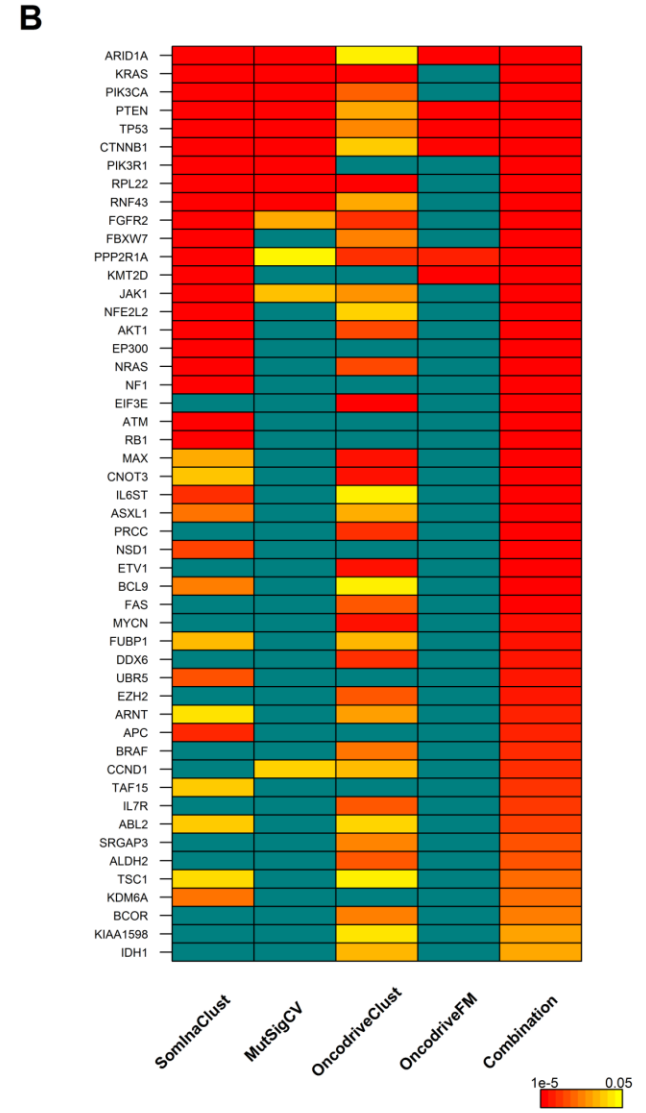

Supplement: 12859_2015_555_MOESM10_ESM.pdf [file 12859_2015_555_MOESM10_ESM.pdf]
